# Supplementary material for: Changes of structure and IgE binding capacity of shrimp (Metapenaeus ensis) tropomyosin followed by acrolein treatment
Source: Royal Society of Chemistry journal article supplement (doi:10.1039/c6fo01479h), 2017-01-01
Supplement: c6fo01479h1.pdf [file c6fo01479h1.pdf]

### Pooling of sera from patients with allergy to shrimp

Serum samples from 15 people with allergy to shrimp tropomyosin were tested in this study. Serum-specific IgE antibodies to shrimp tropomyosin were analyzed by Allergy Screen (MEDIWISS Analytic GmbH, Moers, Germany). All selected serum samples with Special-IgE values higher than or equal to 0.5 kU<sub>A</sub>/L were pooled.

Table S1. Demographic, clinical and serologic characterization of shrimp allergic people

| Patient no. | Age      | Shrimp-related symptoms | TM Special-IgE (kU <sub>A</sub> /L) |
|-------------|----------|-------------------------|-------------------------------------|
| 1           | 8 years  | asthma                  | 0.12                                |
| 2           | 13 years | bronchial asthma        | 7.26                                |
| 3           | 35 years | bronchial asthma        | 0.18                                |
| 4           | 6 years  | eczema                  | 0.45                                |
| 5           | 8 years  | cough variant asthma    | 12                                  |
| 6           | 16 years | asthma                  | 5.36                                |
| 7           | 23 years | urticarial              | 0.13                                |
| 8           | 26 years | cough variant asthma    | 0.22                                |
| 9           | 15 years | leukocytosis            | 25.6                                |
| 10          | 18 years | eczema                  | 0.04                                |
| 11          | 36 years | urticarial              | 0.25                                |
| 12          | 54 years | rhinoconjunctivitis     | 0.02                                |
| 13          | 17 years | rhinoconjunctivitis     | 6.18                                |
| 14          | 21 years | pneumonia               | 0.19                                |
| 15          | 16 years | rhinoconjunctivitis     | 0.35                                |

TM, tropomyosin
